# Supplementary material
Source: publisher figshare collection journal article supplement (https://future-science-group.figshare.com/ndownloader/files/35457494)
Supplement: Supplementary file 1 [file 35457494]

| Patent Family Number                                                                                                                                                                                                      | Publication Date | Title                                                               | Applicant             | Subject Matter  | Condition                                              |
|---------------------------------------------------------------------------------------------------------------------------------------------------------------------------------------------------------------------------|------------------|---------------------------------------------------------------------|-----------------------|-----------------|--------------------------------------------------------|
| WO2009132135 (B)<br>US2009317361<br>EP2268642<br>KR2011004883<br>CN102015714<br>JP2011521903<br>EP2937350<br>KR2016138591                                                                                                 | out 29, 2009     | 1'-Substituted carba-nucleoside analogs for antiviral treatment     | Gilead Sciences, Inc. | Drug Substances | Hepatitis C (HCV)                                      |
| WO2012012776 (B)<br>US2012027752<br>CN103052631<br>EP2595980<br>KR2013091743<br>JP2013535453<br>US2015111839<br>US2015152116<br>CN105343098<br>KR2018012336<br>US10065958<br>US2019055251<br>IN201948034308<br>US10696679 | jan 26, 2012     | Methods and compounds for treating Paramyxoviridae virus infections | Gilead Sciences, Inc. | Methods of Use  | Infection, paramyxovirus                               |
| WO2016069826 (B)<br>US2016122374<br>US9724360<br>JP2017534614<br>CN113620992                                                                                                                                              | mai 6, 2016      | Methods for treating Filoviridae virus infections                   | Gilead Sciences, Inc. | Methods of Use  | Ebola virus disease<br>Marburg virus hemorrhagic fever |
| WO2016069827 (B)                                                                                                                                                                                                          | mai 6, 2016      | Methods for treating Filoviridae virus infections                   | Gilead Sciences, Inc. | Methods of Use  | Ebola virus disease<br>Marburg virus hemorrhagic fever |
| WO2017184668 (B)                                                                                                                                                                                                          | out 26, 2017     | Methods for treating Flaviviridae virus infections                  | Gilead Sciences, Inc. | Methods of Use  | Infection, Zika virus                                  |
| US2016361330 (B)<br>US9949994                                                                                                                                                                                             | abr 24, 2018     | Methods for treating Filoviridae virus infections                   | Gilead Sciences, Inc. | Methods of Use  | Ebola virus disease<br>Marburg virus hemorrhagic fever |

| Patent Family Number                                                                                                                                           | Publication Date | Title                                                                                                                                                                                            | Applicant                                           | Subject Matter                   | Condition                                                                                            |
|----------------------------------------------------------------------------------------------------------------------------------------------------------------|------------------|--------------------------------------------------------------------------------------------------------------------------------------------------------------------------------------------------|-----------------------------------------------------|----------------------------------|------------------------------------------------------------------------------------------------------|
| WO2018204198 (B)<br>US2018346504<br>KR2019141747<br>CN110636884<br>IN201917048029<br>EP3618929<br>JP2020518578<br>US10836787<br>US2021163523<br>IN202118042632 | nov 8, 2018      | Crystalline forms of (S)-2-ethylbutyl 2-(((S)-((2R,3S,4R,5R)-5-(4-aminopyrrolo[2,1-f][1,2,4]triazin-7-yl)-5-cyano-3,4-dihydroxytetrahydrofuran-2-yl)methoxy)(phenoxy)phosphoryl)amino)propanoate | Gilead Sciences, Inc.                               | Drug Substances<br>Polymorphs    | Infection, viral                                                                                     |
| WO2019014247 (B)<br>US2019083525<br>CN111093627<br>EP3651734<br>US10675296<br>US2020360420<br>US11266681                                                       | jan 17, 2019     | Compositions comprising an RNA polymerase inhibitor and cyclodextrin for treating viral infections                                                                                               | Gilead Sciences, Inc.                               | Dosage Forms and<br>Compositions | Infection, viral                                                                                     |
| US2018311263 (B)<br>US10251898                                                                                                                                 | abr 9, 2019      | Methods for treating Filoviridae virus infections                                                                                                                                                | Gilead Sciences, Inc.                               | Methods of Use                   | Viral hemorrhagic fever<br>(filovirus infection)                                                     |
| CN109748943 (B)                                                                                                                                                | mai 14, 2019     | 2'-C-Methyl substituted nucleoside compound and preparation and application thereof                                                                                                              | Shanghai Institute of<br>Materia Medica (SIMM)      | Drug Substances<br>Prodrugs      | Cancer<br>Severe acute respiratory<br>syndrome coronavirus 2<br>(SARS-CoV-2) infection<br>(COVID-19) |
| US2019275063 (B)<br>US10695357                                                                                                                                 | set 12, 2019     | Methods for treating Filoviridae virus infections                                                                                                                                                | Gilead Sciences, Inc.                               | Methods of Use                   | Infection, viral                                                                                     |
| CN111116656 (B)                                                                                                                                                | mai 8, 2020      | Preparation method of remdesivir                                                                                                                                                                 | Jiangsu Furui Kangtai<br>Pharmaceutical Co., Ltd.   | Prodrugs<br>Synthesis            | Severe acute respiratory<br>syndrome coronavirus 2<br>(SARS-CoV-2) infection<br>(COVID-19)           |
| CN111171078 (B)                                                                                                                                                | mai 19, 2020     | A synthesis method of remdesivir                                                                                                                                                                 | Alpha Pharmaceuticals<br>Co., Ltd. Jiangsu Province | Prodrugs<br>Synthesis            | Severe acute respiratory<br>syndrome coronavirus 2<br>(SARS-CoV-2) infection<br>(COVID-19)           |

| Patent Family Number | Publication Date | Title                                                                                      | Applicant                                            | Subject Matter                      | Condition                                                                         |
|----------------------|------------------|--------------------------------------------------------------------------------------------|------------------------------------------------------|-------------------------------------|-----------------------------------------------------------------------------------|
| CN111187269 (B)      | mai 22, 2020     | A synthesis method of remdesivir intermediate                                              | Alpha Pharmaceuticals Co., Ltd. Jiangsu Province     | Prodrugs<br>Synthesis Intermediates | Severe acute respiratory syndrome coronavirus 2 (SARS-CoV-2) infection (COVID-19) |
| CN111205294 (B)      | mai 29, 2020     | A preparation method of remdesivir intermediate                                            | Alpha Pharmaceuticals Co., Ltd. Jiangsu Province     | Prodrugs<br>Synthesis Intermediates | Severe acute respiratory syndrome coronavirus 2 (SARS-CoV-2) infection (COVID-19) |
| CN111205327 (B)      | mai 29, 2020     | A preparation method of remdesivir                                                         | Nanjing Finetech Chemical Co., Ltd.                  | Synthesis                           | Severe acute respiratory syndrome coronavirus 2 (SARS-CoV-2) infection (COVID-19) |
| CN111233869 (B)      | jun 5, 2020      | New compound used for preparing remdesivir key intermediate and preparation method thereof | Hangzhou SIMBOS Pharm Co., Ltd.                      | Prodrugs<br>Synthesis Intermediates | Severe acute respiratory syndrome coronavirus 2 (SARS-CoV-2) infection (COVID-19) |
| CN111233870 (B)      | jun 5, 2020      | Method for quickly preparing remdesivir medicine intermediate                              | University of Science and Technology of China (USTC) | Prodrugs<br>Synthesis Intermediates | Severe acute respiratory syndrome coronavirus 2 (SARS-CoV-2) infection (COVID-19) |
| CN111233929 (B)      | jun 5, 2020      | Deuterium A nucleoside analogue and preparation method and use thereof                     | Chengdu Aqi Biopharma Technology Co., Ltd.           | Drug Substances                     | Severe acute respiratory syndrome coronavirus 2 (SARS-CoV-2) infection (COVID-19) |
| CN111233930 (B)      | jun 5, 2020      | A preparation method of remdesivir                                                         | Alpha Pharmaceuticals Co., Ltd. Jiangsu Province     | Prodrugs<br>Synthesis               | Severe acute respiratory syndrome coronavirus 2 (SARS-CoV-2) infection (COVID-19) |
| CN111233931 (B)      | jun 5, 2020      | A synthesis method of remdesivir                                                           | Suqian Shengji Pharmaceutical Technology Co., Ltd.   | Synthesis                           | Severe acute respiratory syndrome coronavirus 2 (SARS-CoV-2) infection (COVID-19) |

| Patent Family Number           | Publication Date | Title                                                                                               | Applicant                                                                                                                                 | Subject Matter                                   | Condition                                                                         |
|--------------------------------|------------------|-----------------------------------------------------------------------------------------------------|-------------------------------------------------------------------------------------------------------------------------------------------|--------------------------------------------------|-----------------------------------------------------------------------------------|
| CN111269263 (B)                | jun 12, 2020     | A remdesivir side-chain intermediate and preparation method thereof                                 | Knowshine (Shanghai) Pharmaceuticals Inc.                                                                                                 | Prodrugs<br>Synthesis Intermediates              | Severe acute respiratory syndrome coronavirus 2 (SARS-CoV-2) infection (COVID-19) |
| CN111320650 (B)                | jun 23, 2020     | Derivatives of remdesivir and pharmaceutical use thereof                                            | Nanjing Medical University (NMU)                                                                                                          | Drug Substances<br>Prodrugs                      | Severe acute respiratory syndrome coronavirus 2 (SARS-CoV-2) infection (COVID-19) |
| CN111320662 (B)                | jun 23, 2020     | An N-benzyl substituted amidine derivatives and pharmaceutical use thereof                          | Nanjing Medical University (NMU)                                                                                                          | Drug Conjugates<br>Drug Substances               | Infection, viral                                                                  |
| US2020197422 (B)               | jun 25, 2020     | Methods for the preparation of ribosides                                                            | Gilead Sciences, Inc.                                                                                                                     | Prodrugs<br>Synthesis<br>Synthesis Intermediates | Severe acute respiratory syndrome coronavirus 2 (SARS-CoV-2) infection (COVID-19) |
| US2019255085 (B)<br>US10695361 | jun 30, 2020     | Methods for treating Arenaviridae and Coronaviridae virus infections                                | Gilead Sciences, Inc.                                                                                                                     | Methods of Use                                   | Coronavirus acute respiratory syndrome                                            |
| CN111393243 (B)                | jul 10, 2020     | A medicine for phosphorus chiral synthesis method of nucleoside medicine and obtained by the method | Shenzhen Qianhai Boyang Research Institute Co., Ltd.                                                                                      | Prodrugs<br>Synthesis                            | Severe acute respiratory syndrome coronavirus 2 (SARS-CoV-2) infection (COVID-19) |
| CN111393314 (B)                | jul 10, 2020     | 2-Alkyl-2-amino acid preparing method of creatine ester hydrochloride                               | Anhui Redwood Biomedical Technology Co., Ltd.                                                                                             | Prodrugs<br>Synthesis Intermediates              | Severe acute respiratory syndrome coronavirus 2 (SARS-CoV-2) infection (COVID-19) |
| CN111393392 (B)                | jul 10, 2020     | Synthesis of 2,3,5-tri-O-benzyl-D-ribo-1,4-lactone, a key intermediate of remdesivir                | Henan Academy of Sciences<br>High & New Technology Research Center, Henan Academy of Sciences<br>Shanghai Micro-Mega Industrial Co., Ltd. | Prodrugs<br>Synthesis Intermediates              | Severe acute respiratory syndrome coronavirus 2 (SARS-CoV-2) infection (COVID-19) |

| Patent Family Number | Publication Date | Title                                                                                                                    | Applicant                                                   | Subject Matter                   | Condition                                                                                                                                              |
|----------------------|------------------|--------------------------------------------------------------------------------------------------------------------------|-------------------------------------------------------------|----------------------------------|--------------------------------------------------------------------------------------------------------------------------------------------------------|
| CN111393478 (B)      | jul 10, 2020     | A method for synthesizing new crown virus COVID-19 infection pneumonia medicine                                          | Shenzhen Qianhai Boyang Research Institute Co., Ltd.        | Prodrugs Synthesis               | Severe acute respiratory syndrome coronavirus 2 (SARS-CoV-2) infection (COVID-19)                                                                      |
| CN111423443 (B)      | jul 17, 2020     | A 4-amino-7-iodine pyrrolo[2,1-f][1,2,4] the preparation method of triazine                                              | Guangzhou Current Biotechnology Co., Ltd.                   | Prodrugs Synthesis Intermediates | Middle East respiratory syndrome coronavirus (MERS-CoV) infection<br>Severe acute respiratory syndrome coronavirus 2 (SARS-CoV-2) infection (COVID-19) |
| CN111440176 (B)      | jul 24, 2020     | Synthesis method of metal complex promoted redisivir intermediate                                                        | Jiangsu University                                          | Prodrugs Synthesis Intermediates | Severe acute respiratory syndrome coronavirus 2 (SARS-CoV-2) infection (COVID-19)                                                                      |
| CN111470946 (B)      | jul 31, 2020     | A method to prepare a 2-ethyl-1-butanol intermediate for the synthesis of remdesivir                                     | Suzhou Lixin Pharmaceutical Co., Ltd.                       | Prodrugs Synthesis Intermediates | Severe acute respiratory syndrome coronavirus 2 (SARS-CoV-2) infection (COVID-19)                                                                      |
| CN111471070 (B)      | jul 31, 2020     | Synthesis method of remdesivir                                                                                           | Alpha Pharmaceuticals Co., Ltd. Jiangsu Province            | Synthesis                        | Severe acute respiratory syndrome coronavirus 2 (SARS-CoV-2) infection (COVID-19)                                                                      |
| CN111494396 (B)      | ago 7, 2020      | Application of substituted amino metacetic acid ester compound in treating SARS-CoV-2 infection                          | Military Medical Institute Academy of Military Sciences PLA | Methods of Use                   | Severe acute respiratory syndrome coronavirus 2 (SARS-CoV-2) infection (COVID-19)                                                                      |
| CN111548328 (B)      | ago 18, 2020     | Method for preparing 2,3,5-tribenzyloxy-F-ribose acid-1, 4-lactone by oxidation in continuous flow micro-channel reactor | Alpha Pharmaceuticals Co., Ltd. Jiangsu Province            | Prodrugs Synthesis Intermediates | Severe acute respiratory syndrome coronavirus 2 (SARS-CoV-2) infection (COVID-19)                                                                      |
| CN111620876 (B)      | set 4, 2020      | Synthesis method of remdesivir key intermediate                                                                          | Puji Biotechnology (Taizhou) Co., Ltd.                      | Prodrugs Synthesis Intermediates | Severe acute respiratory syndrome coronavirus 2 (SARS-CoV-2) infection (COVID-19)                                                                      |

| Patent Family Number | Publication Date | Title                                                                                                                              | Applicant                                                                                     | Subject Matter                      | Condition                                                                                                |
|----------------------|------------------|------------------------------------------------------------------------------------------------------------------------------------|-----------------------------------------------------------------------------------------------|-------------------------------------|----------------------------------------------------------------------------------------------------------|
| CN111620903 (B)      | set 4, 2020      | C-nucleoside analogues and preparation method of nitrile C-nucleoside compound for synthesizing remdesivir and application thereof | Anhui Biochem United Pharmaceutical Co., Ltd.                                                 | Prodrugs<br>Synthesis Intermediates | Ebola virus disease<br>Severe acute respiratory syndrome coronavirus 2 (SARS-CoV-2) infection (COVID-19) |
| CN111732618 (B)      | out 2, 2020      | A method to prepare a key intermediate for the synthesis of redemsivir                                                             | Zhenjiang Jujie New Material Technology Research and Development Center (Limited Partnership) | Prodrugs<br>Synthesis Intermediates | Severe acute respiratory syndrome coronavirus 2 (SARS-CoV-2) infection (COVID-19)                        |
| IN202011022634 (B)   | out 9, 2020      | Transmucosal dosage forms of remdesivir                                                                                            | Jubilant Generics Ltd.                                                                        | Dosage Forms and Compositions       | Severe acute respiratory syndrome coronavirus 2 (SARS-CoV-2) infection (COVID-19)                        |
| CN111821310 (B)      | out 27, 2020     | Redisivir preparation and adaptation disease thereof                                                                               | Venturepharm Laboratories Ltd.                                                                | Dosage Forms and Compositions       | Severe acute respiratory syndrome coronavirus 2 (SARS-CoV-2) infection (COVID-19)                        |
| CN111848427 (B)      | out 30, 2020     | Purifying method of L-alanine-2-ethyl butyl ester hydrochloride                                                                    | Sichuan Tongsheng Biotechnology Co., Ltd.                                                     | Processes                           | Infection, viral                                                                                         |
| CN111848679 (B)      | out 30, 2020     | A method for synthesizing rudsivir by micro-channel reaction technology                                                            | Hangzhou Cheminspire Technologies Co., Ltd.<br>Shandong Kechao Biopharmaceutical Co., Ltd.    | Prodrugs<br>Synthesis               | Severe acute respiratory syndrome coronavirus 2 (SARS-CoV-2) infection (COVID-19)                        |
| CN111875638 (B)      | nov 3, 2020      | A method to prepare a remdesivir derivative and its application                                                                    | Jiangsu Institute of Nuclear Medicine                                                         | Diagnosis<br>Synthesis              | Diagnostics<br>Severe acute respiratory syndrome coronavirus 2 (SARS-CoV-2) infection (COVID-19)         |

| Patent Family Number                            | Publication Date | Title                                                                                                                 | Applicant                       | Subject Matter                                                                    | Condition                                                                                                                                                                                                                    |
|-------------------------------------------------|------------------|-----------------------------------------------------------------------------------------------------------------------|---------------------------------|-----------------------------------------------------------------------------------|------------------------------------------------------------------------------------------------------------------------------------------------------------------------------------------------------------------------------|
| US2020352967 (B)<br>US11007208                  | nov 12, 2020     | Methods for treating Arenaviridae and Coronaviridae virus infections                                                  | Gilead Sciences, Inc.           | Methods of Use                                                                    | Middle East respiratory syndrome coronavirus (MERS-CoV) infection<br>Severe acute respiratory syndrome coronavirus (SARS-CoV) infection                                                                                      |
| CN111956630 (B)                                 | nov 20, 2020     | A liquid composition of powdered remdesivir, its preparation method and its application                               | Dalian University of Technology | Dosage Forms and Compositions                                                     | Severe acute respiratory syndrome coronavirus 2 (SARS-CoV-2) infection (COVID-19)                                                                                                                                            |
| CN111991374 (B)                                 | nov 27, 2020     | A redesivir inhalation aerosol and preparation method thereof                                                         | Dalian University of Technology | Dosage Forms and Compositions                                                     | Severe acute respiratory syndrome coronavirus 2 (SARS-CoV-2) infection (COVID-19)                                                                                                                                            |
| CN111991375 (B)                                 | nov 27, 2020     | An inhalable liposomal formulation of atomized remdesivir and its preparation method                                  | China Pharmaceutical University | Carrier-mediated drug delivery<br>Dosage Forms and Compositions<br>Nanotechnology | Severe acute respiratory syndrome coronavirus (SARS-CoV) infection                                                                                                                                                           |
| WO2020247633 (B)<br>CN113993521<br>KR2022017937 | dez 10, 2020     | Thiarabine- and thiarabine prodrug-based treatments                                                                   | Southern Research Institute     | Antibodies<br>Combination Products<br>Prodrugs                                    | Cancer, liver<br>Severe acute respiratory syndrome coronavirus 2 (SARS-CoV-2) infection (COVID-19)                                                                                                                           |
| CN112142810 (B)                                 | dez 29, 2020     | Nucleotide double amino phosphate compound, pharmaceutical composition and preparation method and application thereof | Foshan University               | Drug Substances                                                                   | Middle East respiratory syndrome coronavirus (MERS-CoV) infection<br>Severe acute respiratory syndrome coronavirus (SARS-CoV) infection<br>Severe acute respiratory syndrome coronavirus 2 (SARS-CoV-2) infection (COVID-19) |

| Patent Family Number | Publication Date | Title                                                                                                                     | Applicant                                                                       | Subject Matter                                                            | Condition                                                                                                                                                                                                                    |
|----------------------|------------------|---------------------------------------------------------------------------------------------------------------------------|---------------------------------------------------------------------------------|---------------------------------------------------------------------------|------------------------------------------------------------------------------------------------------------------------------------------------------------------------------------------------------------------------------|
| CN112168956 (B)      | jan 5, 2021      | A preparation method of active peptide bactericidal antiviral spray                                                       | Hefei Tiantai Technology Co., Ltd.                                              | Devices<br>Dosage Forms and Compositions<br>Natural Products<br>Processes | Severe acute respiratory syndrome coronavirus 2 (SARS-CoV-2) infection (COVID-19)                                                                                                                                            |
| CN112194661 (B)      | jan 8, 2021      | A preparation method of 4-amino-7-iodo-pyrrolo[2,1-f][1,2,4]triazine                                                      | Weihai Tongfeng Marine Biotechnology Co., Ltd.                                  | Prodrugs<br>Synthesis Intermediates                                       | Severe acute respiratory syndrome coronavirus 2 (SARS-CoV-2) infection (COVID-19)                                                                                                                                            |
| CN112194680 (B)      | jan 8, 2021      | Nucleotide amino phosphate compound, pharmaceutical composition and preparation method and application thereof            | Foshan University                                                               | Drug Substances                                                           | Middle East respiratory syndrome coronavirus (MERS-CoV) infection<br>Severe acute respiratory syndrome coronavirus (SARS-CoV) infection<br>Severe acute respiratory syndrome coronavirus 2 (SARS-CoV-2) infection (COVID-19) |
| CN112194681 (B)      | jan 8, 2021      | Nucleotide long chain amino phosphate compound, pharmaceutical composition and preparation method and application thereof | Foshan University                                                               | Drug Substances                                                           | Middle East respiratory syndrome coronavirus (MERS-CoV) infection<br>Severe acute respiratory syndrome coronavirus (SARS-CoV) infection<br>Severe acute respiratory syndrome coronavirus 2 (SARS-CoV-2) infection (COVID-19) |
| CN112250696 (B)      | jan 22, 2021     | A method for preparing radecevir key intermediate by using new micro-channel reactor                                      | Nanjing Advanced Biomaterial and Process Equipment Research Institute Co., Ltd. | Prodrugs<br>Synthesis Intermediates                                       | Severe acute respiratory syndrome coronavirus 2 (SARS-CoV-2) infection (COVID-19)                                                                                                                                            |



| Patent Family Number | Publication Date | Title                                                                                            | Applicant                                                                                  | Subject Matter                                   | Condition                                                                                                                                                                                                                    |
|----------------------|------------------|--------------------------------------------------------------------------------------------------|--------------------------------------------------------------------------------------------|--------------------------------------------------|------------------------------------------------------------------------------------------------------------------------------------------------------------------------------------------------------------------------------|
| CN112274520 (B)      | jan 29, 2021     | Application of remdesivir in preparing medicine for treating idiopathic pulmonary fibrosis       | Tianjin Jikun Pharmaceutical Technology Co., Ltd.                                          | Methods of Use                                   | Idiopathic pulmonary fibrosis                                                                                                                                                                                                |
| CN112279855 (B)      | jan 29, 2021     | A method for continuously preparing remdesivir intermediate by using micro-channel reactor       | Nanjing Advanced Biomaterial and Process Equipment Research Institute Co., Ltd.            | Prodrugs<br>Synthesis Intermediates              | Severe acute respiratory syndrome coronavirus 2 (SARS-CoV-2) infection (COVID-19)                                                                                                                                            |
| CN112300236 (B)      | fev 2, 2021      | Nucleotide mixed amino phosphate compound, pharmaceutical composition and application thereof    | Foshan University                                                                          | Drug Substances                                  | Middle East respiratory syndrome coronavirus (MERS-CoV) infection<br>Severe acute respiratory syndrome coronavirus (SARS-CoV) infection<br>Severe acute respiratory syndrome coronavirus 2 (SARS-CoV-2) infection (COVID-19) |
| CN112321589 (B)      | fev 5, 2021      | A synthesis method of anti-virus medicine remdesivir and intermediate thereof                    | Hangzhou Cheminspire Technologies Co., Ltd.<br>Shandong Kechao Biopharmaceutical Co., Ltd. | Prodrugs<br>Synthesis<br>Synthesis Intermediates | Ebola virus disease<br>Severe acute respiratory syndrome coronavirus 2 (SARS-CoV-2) infection (COVID-19)                                                                                                                     |
| CN112358513 (B)      | fev 12, 2021     | A method for preparing redisivir intermediate by using continuous flow reactor                   | Shanghai Puyi Chem-Tech Co., Ltd.                                                          | Prodrugs<br>Synthesis Intermediates              | Ebola virus disease                                                                                                                                                                                                          |
| CN112402371 (B)      | fev 26, 2021     | An injectable formulation of redemsivir and its preparation method                               | Nanjing Zenji Pharmaceutical Research Co., Ltd.                                            | Dosage Forms and Compositions                    | Severe acute respiratory syndrome coronavirus 2 (SARS-CoV-2) infection (COVID-19)                                                                                                                                            |
| CN112457318 (B)      | mar 9, 2021      | A method to synthesize a redemsivir intermediate                                                 | Nanjing Habo Medical Technology Co., Ltd.                                                  | Prodrugs<br>Synthesis Intermediates              | Severe acute respiratory syndrome coronavirus 2 (SARS-CoV-2) infection (COVID-19)                                                                                                                                            |
| CN112494500 (B)      | mar 16, 2021     | Application of remdesivir in preparing medicine for treating anti-tumour medicine heart toxicity | Beijing Jianmu Technology Co., Ltd.                                                        | Methods of Use                                   | Cardiotoxicity                                                                                                                                                                                                               |

| Patent Family Number | Publication Date | Title                                                                                                   | Applicant                                                                                                                            | Subject Matter                                                           | Condition                                                                                                                                                             |
|----------------------|------------------|---------------------------------------------------------------------------------------------------------|--------------------------------------------------------------------------------------------------------------------------------------|--------------------------------------------------------------------------|-----------------------------------------------------------------------------------------------------------------------------------------------------------------------|
| CN112500417 (B)      | mar 16, 2021     | A preparation method of 4-amino-pyrrolo[2,1-f][1,2,4]triazine                                           | Shandong Chengchuang<br>Blue Sea Pharmaceutical<br>Technology Co., Ltd.<br>Shandong Chenghui<br>Shuangda Pharmaceutical<br>Co., Ltd. | Prodrugs<br>Synthesis Intermediates                                      | Severe acute respiratory<br>syndrome coronavirus 2<br>(SARS-CoV-2) infection<br>(COVID-19)                                                                            |
| CN112500429 (B)      | mar 16, 2021     | A method to prepare an intermediate in the synthesis of<br>remdesivir                                   | Southeast University                                                                                                                 | Prodrugs<br>Synthesis Intermediates                                      | Middle East respiratory<br>syndrome coronavirus<br>(MERS-CoV) infection<br>Severe acute respiratory<br>syndrome coronavirus 2<br>(SARS-CoV-2) infection<br>(COVID-19) |
| CN112522203 (B)      | mar 19, 2021     | Cell vesicle for expressing chimeric antigen receptor and<br>preparation method and application thereof | Fifth Affiliated Hospital<br>Sun Yat-Sen University                                                                                  | Biological manufacturing<br>process<br>Cells                             | Severe acute respiratory<br>syndrome coronavirus 2<br>(SARS-CoV-2) infection<br>(COVID-19)                                                                            |
| CN112618540 (B)      | abr 9, 2021      | Application of substituted indole compound in preparing anti-<br>coronavirus preparation                | Institute of Medicinal<br>Biotechnology                                                                                              | Drug Substances                                                          | Severe acute respiratory<br>syndrome coronavirus 2<br>(SARS-CoV-2) infection<br>(COVID-19)                                                                            |
| CN112618557 (B)      | abr 9, 2021      | Use of remdesivir in preparing medicines for treating diabetic<br>complication                          | Beijing Jianmu<br>Technology Co., Ltd.                                                                                               | Methods of Use                                                           | Atherosclerosis<br>Coronary heart disease<br>Diabetic nephropathy<br>Hyperlipidemia                                                                                   |
| CN112625043 (B)      | abr 9, 2021      | Synthesis method of remdesivir intermediate triazine amine<br>derivative                                | Lakestar PharmaTech Co.,<br>Ltd.                                                                                                     | Prodrugs<br>Synthesis Intermediates<br>Carrier-mediated drug<br>delivery | Coronavirus acute<br>respiratory syndrome                                                                                                                             |
| CN112656759 (B)      | abr 16, 2021     | Redesivir eye drop and preparation method and use thereof                                               | Henan Taifeng<br>Biotechnology Co., Ltd.                                                                                             | Dosage Forms and<br>Compositions                                         | Infection, eye                                                                                                                                                        |

| Patent Family Number           | Publication Date | Title                                                                                                  | Applicant                                                                                               | Subject Matter                   | Condition                                                                                                                                                           |
|--------------------------------|------------------|--------------------------------------------------------------------------------------------------------|---------------------------------------------------------------------------------------------------------|----------------------------------|---------------------------------------------------------------------------------------------------------------------------------------------------------------------|
| CN112679542 (B)                | abr 20, 2021     | A method for preparing ratesivir by using a microchannel                                               | Nanjing Advanced Biomaterial and Process Equipment Research Institute Co., Ltd.                         | Prodrugs Synthesis               | Severe acute respiratory syndrome coronavirus 2 (SARS-CoV-2) infection (COVID-19)                                                                                   |
| CN112745324 (B)                | mai 4, 2021      | A method for synthesizing nucleoside analogues by continuous flow reactor                              | Acesys Pharmatech                                                                                       | Prodrugs Synthesis Intermediates | Severe acute respiratory syndrome coronavirus 2 (SARS-CoV-2) infection (COVID-19)                                                                                   |
| CN112778310 (B)                | mai 11, 2021     | Use of nucleoside analogues or a combination preparation comprising nucleoside analogues for antiviral | Shanghai Institute of Materia Medica (SIMM)<br>Wuhan Institute of Virology, Chinese Academy of Sciences | Drug Substances                  | Coronavirus acute respiratory syndrome Infection, Flavivirus Infection, respiratory syncytial virus (RSV) Influenza<br>Viral hemorrhagic fever (filovrus infection) |
| US11013688 (B)<br>WO2021239346 | mai 25, 2021     | Methods of treatment of viral diseases                                                                 | Soft hale NV                                                                                            | Dosage Forms and Compositions    | Severe acute respiratory syndrome coronavirus 2 (SARS-CoV-2) infection (COVID-19)                                                                                   |
| CN112844472 (B)                | mai 28, 2021     | Preparation method of chiral imidazole urea catalyst and application thereof                           | Shenzhen Feiyang Xingye Technology Co., Ltd.                                                            | Synthesis Intermediates          | Severe acute respiratory syndrome coronavirus 2 (SARS-CoV-2) infection (COVID-19)                                                                                   |
| CN112876524 (B)                | jun 1, 2021      | Preparation method of redisivir intermediate                                                           | Shanghai Famo Biotechnology Co., Ltd.                                                                   | Prodrugs Synthesis Intermediates | Severe acute respiratory syndrome coronavirus 2 (SARS-CoV-2) infection (COVID-19)                                                                                   |
| US11020349 (B)                 | jun 1, 2021      | Transmucosal dosage forms of remdesivir                                                                | Jubilant Generics Ltd.                                                                                  | Dosage Forms and Compositions    | Severe acute respiratory syndrome coronavirus 2 (SARS-CoV-2) infection (COVID-19)                                                                                   |

| Patent Family Number | Publication Date | Title                                                                     | Applicant                                                                                          | Subject Matter                   | Condition                                                                         |
|----------------------|------------------|---------------------------------------------------------------------------|----------------------------------------------------------------------------------------------------|----------------------------------|-----------------------------------------------------------------------------------|
| US2021161927 (B)     | jun 3, 2021      | Isomorphs of remdesivir and methods for synthesis of same                 | Anzalp Pharmsolutions Pvt. Ltd.                                                                    | Prodrugs Synthesis               | Severe acute respiratory syndrome coronavirus 2 (SARS-CoV-2) infection (COVID-19) |
| CN112979736 (B)      | jun 18, 2021     | A method to prepare remdesivir                                            | Nanjing Ocean Pharmaceutical Technology Co., Ltd.                                                  | Prodrugs Synthesis               | Severe acute respiratory syndrome coronavirus 2 (SARS-CoV-2) infection (COVID-19) |
| IN202011023385 (B)   | jun 18, 2021     | Pharmaceutical lipid compositions of remdesivir                           | Jubilant Generics Ltd.                                                                             | Dosage Forms and Compositions    | Severe acute respiratory syndrome coronavirus 2 (SARS-CoV-2) infection (COVID-19) |
| IN202114023358 (B)   | jun 18, 2021     | Transmucosal pharmaceutical compositions of antiviral drugs               | Jubilant Generics Ltd.                                                                             | Dosage Forms and Compositions    | Severe acute respiratory syndrome coronavirus 2 (SARS-CoV-2) infection (COVID-19) |
| CN113004330 (B)      | jun 22, 2021     | Preparation method of high-purity redisivir                               | Qilu Pharmaceutical Co., Ltd.                                                                      | Prodrugs Synthesis               | Coronavirus acute respiratory syndrome                                            |
| CN113121600 (B)      | jul 16, 2021     | Remdesivir dipolymer and preparation method and application thereof       | Macau University of Science and Technology (MUST)                                                  | Drug Substances                  | Infection, viral                                                                  |
| CN113143917 (B)      | jul 23, 2021     | New use of GC376 compound                                                 | Beijing Institute of Microbiology<br>Chinese Center for Disease Control and Prevention (China CDC) | Combination Products             | Severe acute respiratory syndrome coronavirus 2 (SARS-CoV-2) infection (COVID-19) |
| CN113143918 (B)      | jul 23, 2021     | Application of boloser in treating or improving new coronavirus pneumonia | Beijing Institute of Microbiology<br>Chinese Center for Disease Control and Prevention (China CDC) | Combination Products             | Severe acute respiratory syndrome coronavirus 2 (SARS-CoV-2) infection (COVID-19) |
| CN113149994 (B)      | jul 23, 2021     | Preparation method of redisivir intermediate and application thereof      | Guangzhou Liushun Biotechnology Co., Ltd.                                                          | Prodrugs Synthesis Intermediates | Severe acute respiratory syndrome coronavirus 2 (SARS-CoV-2) infection (COVID-19) |

| Patent Family Number                                                                         | Publication Date | Title                                                                         | Applicant                                                         | Subject Matter                      | Condition                                                                                                                                              |
|----------------------------------------------------------------------------------------------|------------------|-------------------------------------------------------------------------------|-------------------------------------------------------------------|-------------------------------------|--------------------------------------------------------------------------------------------------------------------------------------------------------|
| CN111265532 (B)<br>US2021220377<br>EP3854403<br>WO2021147236<br>JP2021116295<br>US2021346411 | jul 29, 2021     | Substituted amino acid ester compound in the treatment of 2019-nCoV infection | Military Medical Institute<br>Academy of Military<br>Sciences PLA | Methods of Use                      | Severe acute respiratory syndrome coronavirus 2 (SARS-CoV-2) infection (COVID-19)                                                                      |
| US2021228605 (B)                                                                             | jul 29, 2021     | Isomorphs of Remdesivir and methods for synthesis of same                     | Anzalp Pharmsolutions<br>Pvt. Ltd.                                | Prodrugs<br>Synthesis               | Severe acute respiratory syndrome coronavirus 2 (SARS-CoV-2) infection (COVID-19)                                                                      |
| WO2021154687 (B)<br>US2021283150                                                             | ago 5, 2021      | Methods for treating SARS-CoV-2 infections                                    | Gilead Sciences, Inc.                                             | Methods of Use                      | Severe acute respiratory syndrome coronavirus 2 (SARS-CoV-2) infection (COVID-19)                                                                      |
| WO2021155119 (B)                                                                             | ago 5, 2021      | Therapeutics for COVID-19                                                     | Columbia University in the<br>City of New York                    | Methods of Use                      | Severe acute respiratory syndrome coronavirus 2 (SARS-CoV-2) infection (COVID-19)                                                                      |
| CN113214263 (B)                                                                              | ago 6, 2021      | A synthetic method of key intermediate of remdesivir                          | Beijing Chempion<br>Technology Co., Ltd.                          | Prodrugs<br>Synthesis Intermediates | Severe acute respiratory syndrome coronavirus 2 (SARS-CoV-2) infection (COVID-19)                                                                      |
| CN113214320 (B)                                                                              | ago 6, 2021      | Preparation method of remdesivir compound                                     | Henan Taifeng<br>Biotechnology Co., Ltd.                          | Prodrugs<br>Synthesis               | Severe acute respiratory syndrome coronavirus 2 (SARS-CoV-2) infection (COVID-19)                                                                      |
| WO2021159050 (B)                                                                             | ago 12, 2021     | Compositions and methods for treating coronavirus infection                   | Hepalink USA Inc.                                                 | Methods of Use                      | Middle East respiratory syndrome coronavirus (MERS-CoV) infection<br>Severe acute respiratory syndrome coronavirus 2 (SARS-CoV-2) infection (COVID-19) |

| Patent Family Number | Publication Date | Title                                                                                              | Applicant                                              | Subject Matter                                                                       | Condition                                                                                                           |
|----------------------|------------------|----------------------------------------------------------------------------------------------------|--------------------------------------------------------|--------------------------------------------------------------------------------------|---------------------------------------------------------------------------------------------------------------------|
| CN113248507 (B)      | ago 13, 2021     | Synthesis method of redosivir key intermediate 7-halogenated pyrrolo[1,2-f][1,2,4]triazine-4-amine | Shanghai Muse Health Tech Co., Ltd.                    | Prodrugs<br>Synthesis Intermediates                                                  | Severe acute respiratory syndrome coronavirus 2 (SARS-CoV-2) infection (COVID-19)                                   |
| CN113248538 (B)      | ago 13, 2021     | A synthesis method of new synthesis remdesivir                                                     | Shanghai Muse Health Tech Co., Ltd.                    | Prodrugs<br>Synthesis                                                                | Severe acute respiratory syndrome coronavirus 2 (SARS-CoV-2) infection (COVID-19)                                   |
| WO2021160163 (B)     | ago 19, 2021     | Methods for prevention or treatment of virus-induced organ injury or failure with IL-22 dimer      | Evive Biotech Corp. Ltd.                               | Fusion Proteins<br>Methods of Use<br>Therapeutic Proteins                            | Failure, respiratory<br>Infection, viral<br>Injury, lung<br>Multi organ failure<br>Sepsis<br>Septic shock           |
| WO2021160982 (B)     | ago 19, 2021     | Compositions and applications thereof                                                              | Nasaleze Patents Ltd.                                  | Dosage Forms and<br>Compositions                                                     | Severe acute respiratory syndrome coronavirus 2 (SARS-CoV-2) infection (COVID-19)                                   |
| WO2021163199 (B)     | ago 19, 2021     | Treatment of infectious diseases                                                                   | Durect Corp.<br>Virginia Commonwealth University (VCU) | Methods of Use                                                                       | Severe acute respiratory syndrome coronavirus 2 (SARS-CoV-2) infection (COVID-19)                                   |
| US2021260201 (B)     | ago 26, 2021     | Extracellular vesicles for the treatment and prevention of infections and other diseases           | Physis Biotechnologies, LLC                            | Carrier-mediated drug delivery<br>Dosage Forms and<br>Compositions<br>Nanotechnology | Inflammatory disorders<br>Pain<br>Severe acute respiratory syndrome coronavirus 2 (SARS-CoV-2) infection (COVID-19) |
| CN113336758 (B)      | set 3, 2021      | A new synthesis method of compound 7-iodo-pyrrolo[2,1-f][1,2,4]triazine-4-amine                    | Beijing Chempion Technology Co., Ltd.                  | Prodrugs<br>Synthesis Intermediates                                                  | Severe acute respiratory syndrome coronavirus 2 (SARS-CoV-2) infection (COVID-19)                                   |

| Patent Family Number | Publication Date | Title                                                                                      | Applicant                                                                                                              | Subject Matter                                                  | Condition                                                                                       |
|----------------------|------------------|--------------------------------------------------------------------------------------------|------------------------------------------------------------------------------------------------------------------------|-----------------------------------------------------------------|-------------------------------------------------------------------------------------------------|
| CN113350323 (B)      | set 7, 2021      | Inhalation agent for inhibiting coronavirus and preparation method and application thereof | Guangzhou Hengnuokang Pharmaceutical Technology Co., Ltd.<br>Shenzhen Resproly Bio-Pharmaceutical Co., Ltd.            | Carrier-mediated drug delivery<br>Dosage Forms and Compositions | Severe acute respiratory syndrome coronavirus 2 (SARS-CoV-2) infection (COVID-19)               |
| CN113354684 (B)      | set 7, 2021      | A new compound and use thereof                                                             | Hebei Chunbai Biotechnology Co., Ltd.                                                                                  | Drug Substances                                                 | AIDS<br>Coronavirus acute respiratory syndrome<br>Hepatitis B (HBV)<br>Infection, paramyxovirus |
| WO2021175250 (B)     | set 10, 2021     | Compounds and methods for treating diseases and/or conditions caused by coronavirus        | Aptorum Therapeutics Ltd.                                                                                              | Combination Products                                            | Severe acute respiratory syndrome coronavirus 2 (SARS-CoV-2) infection (COVID-19)               |
| WO2021175296 (B)     | set 10, 2021     | Intermediate of remdesivir and preparation method therefor                                 | Shanghai Institute of Materia Medica (SIMM)<br>Suzhou Vigonvita Life Sciences Co., Ltd.<br>Topharman Shanghai Co. Ltd. | Prodrugs<br>Synthesis Intermediates                             | Severe acute respiratory syndrome coronavirus 2 (SARS-CoV-2) infection (COVID-19)               |
| CN113387954 (B)      | set 14, 2021     | Preparation method of Redisivir intermediate                                               | Shanghai Institute of Materia Medica (SIMM)<br>Topharman Shanghai Co. Ltd.                                             | Prodrugs<br>Synthesis Intermediates                             | Severe acute respiratory syndrome coronavirus 2 (SARS-CoV-2) infection (COVID-19)               |

| Patent Family Number             | Publication Date | Title                                                                                        | Applicant                                                                                                                                                                                                                          | Subject Matter                              | Condition                                                                                                                                                                                                                                           |
|----------------------------------|------------------|----------------------------------------------------------------------------------------------|------------------------------------------------------------------------------------------------------------------------------------------------------------------------------------------------------------------------------------|---------------------------------------------|-----------------------------------------------------------------------------------------------------------------------------------------------------------------------------------------------------------------------------------------------------|
| US2021284745 (B)                 | set 16, 2021     | Treatment of cytokine release syndrome with GM-CSF antagonists                               | Kiniksa Pharmaceuticals, Ltd.                                                                                                                                                                                                      | Antibodies<br>Dosage Forms and Compositions | Coronavirus acute respiratory syndrome<br>Inflammatory disorders<br>Middle East respiratory syndrome coronavirus (MERS-CoV) infection<br>Pneumonia, infectious<br>Severe acute respiratory syndrome coronavirus 2 (SARS-CoV-2) infection (COVID-19) |
| WO2021181044 (B)<br>FR3108033    | set 16, 2021     | Composition comprising diltiazem for treating a viral infection caused by SARS-CoV-2 viruses | Centre National de la Recherche Scientifique (CNRS)<br>Ecole Normale Supérieure (ENS) de Lyon<br>Institut National de la Santé et de la Recherche Médicale (INSERM)<br>Signia Therapeutics SAS<br>Université Claude Bernard Lyon 1 | Combination Products                        | Severe acute respiratory syndrome coronavirus 2 (SARS-CoV-2) infection (COVID-19)                                                                                                                                                                   |
| WO2021183456 (B)<br>US2021309733 | set 16, 2021     | Methods for treating coronavirus infection and resulting inflammation-induced lung injury    | Humanigen, Inc.                                                                                                                                                                                                                    | Antibodies<br>Methods of Use<br>Vaccines    | Severe acute respiratory syndrome coronavirus 2 (SARS-CoV-2) infection (COVID-19)                                                                                                                                                                   |
| CN113402546 (B)                  | set 17, 2021     | A dynamic dynamic splitting method for tail chain of intermediate of redsivir phosphate      | Zhejiang Siwei Pharmaceutical Technology Co., Ltd.                                                                                                                                                                                 | Prodrugs<br>Synthesis Intermediates         | Severe acute respiratory syndrome coronavirus 2 (SARS-CoV-2) infection (COVID-19)                                                                                                                                                                   |
| WO2021187842 (B)<br>KR2021116008 | set 23, 2021     | Pharmaceutical preparation for treating SARS-coronavirus infections, and medical use thereof | Institut Pasteur Korea                                                                                                                                                                                                             | Methods of Use                              | Severe acute respiratory syndrome coronavirus 2 (SARS-CoV-2) infection (COVID-19)                                                                                                                                                                   |



| Patent Family Number             | Publication Date | Title                                                                                                                                   | Applicant                                | Subject Matter                                                                    | Condition                                                                                                                                                       |
|----------------------------------|------------------|-----------------------------------------------------------------------------------------------------------------------------------------|------------------------------------------|-----------------------------------------------------------------------------------|-----------------------------------------------------------------------------------------------------------------------------------------------------------------|
| WO2021194860 (B)                 | set 30, 2021     | Tocilizumab and remdesivir combination therapy for COVID-19 pneumonia                                                                   | Genentech, Inc.                          | Antibodies<br>Combination Products                                                | Severe acute respiratory syndrome coronavirus 2 (SARS-CoV-2) infection (COVID-19)                                                                               |
| WO2021194918 (B)                 | set 30, 2021     | Methods of treating pulmonary injury with CGRP inhibitors                                                                               | Biohaven Pharmaceutical Holding Co. Ltd. | Methods of Use                                                                    | Severe acute respiratory syndrome coronavirus 2 (SARS-CoV-2) infection (COVID-19)                                                                               |
| WO2021201699 (B)                 | out 7, 2021      | Antiviral treatment comprising blis containing probiotic products                                                                       | BLIS Technologies Ltd.                   | Methods of Use                                                                    | Infection, respiratory syncytial virus (RSV)<br>Influenza A<br>Influenza B<br>Severe acute respiratory syndrome coronavirus 2 (SARS-CoV-2) infection (COVID-19) |
| WO2021202907 (B)                 | out 7, 2021      | Remdesivir and remdesivir analogs, solutions, and nanoparticle, liposomal, and microparticle compositions for treating viral infections | University of Michigan                   | Carrier-mediated drug delivery<br>Methods of Use<br>Nanotechnology                | Severe acute respiratory syndrome coronavirus 2 (SARS-CoV-2) infection (COVID-19)                                                                               |
| WO2021202912 (B)                 | out 7, 2021      | Compositions for treatment of viral respiratory infections and methods of use thereof                                                   | Washington University                    | Carrier-mediated drug delivery<br>Dosage Forms and Compositions<br>Nanotechnology | Severe acute respiratory syndrome coronavirus 2 (SARS-CoV-2) infection (COVID-19)                                                                               |
| CN113491673 (B)                  | out 12, 2021     | A pharmaceutical composition containing redisivir                                                                                       | Qilu Pharmaceutical Co., Ltd.            | Dosage Forms and Compositions                                                     | Severe acute respiratory syndrome coronavirus 2 (SARS-CoV-2) infection (COVID-19)                                                                               |
| US11141419 (B)<br>US2021338698   | out 12, 2021     | Use of iminosugars as prophylactic and therapy against COVID-19/SARS-CoV-2                                                              | Penn State Research Foundation           | Methods of Use                                                                    | Severe acute respiratory syndrome coronavirus 2 (SARS-CoV-2) infection (COVID-19)                                                                               |
| WO2021207049 (B)<br>US2021330685 | out 14, 2021     | Inhalation formulations of 1'-cyano substituted carbanucleoside analogs                                                                 | Gilead Sciences, Inc.                    | Dosage Forms and Compositions                                                     | Infection, viral                                                                                                                                                |

| Patent Family Number             | Publication Date | Title                                                                                                | Applicant                                                                                                                           | Subject Matter                   | Condition                                                                                                                                                                                                    |
|----------------------------------|------------------|------------------------------------------------------------------------------------------------------|-------------------------------------------------------------------------------------------------------------------------------------|----------------------------------|--------------------------------------------------------------------------------------------------------------------------------------------------------------------------------------------------------------|
| WO2021207155 (B)                 | out 14, 2021     | Airway epithelial alkaline therapy to treat viral respiratory infection                              | Airbase Breathing Co.,<br>Llc.<br>Indiana University                                                                                | Dosage Forms and<br>Compositions | Severe acute respiratory<br>syndrome coronavirus 2<br>(SARS-CoV-2) infection<br>(COVID-19)                                                                                                                   |
| CN113509476 (B)                  | out 19, 2021     | Redisivir composition and application thereof                                                        | Haerbin Huarui<br>Biochemistry<br>Pharmaceutical Industry<br>Co., Ltd.<br>Hangzhou METiS<br>Pharmaceuticals<br>Technology Co., Ltd. | Dosage Forms and<br>Compositions | Ebola virus disease                                                                                                                                                                                          |
| WO2021202649 (B)<br>US2021324066 | out 21, 2021     | Methods and treatment involving excess free LIGHT                                                    | Aevi Genomic Medicine,<br>Inc.                                                                                                      | Biomarkers<br>Kits               | Acute lung injury<br>Acute respiratory distress<br>syndrome (ARDS)<br>Crohn's disease<br>Pneumonia, infectious<br>Severe acute respiratory<br>syndrome coronavirus 2<br>(SARS-CoV-2) infection<br>(COVID-19) |
| WO2021208910 (B)<br>CN113811309  | out 21, 2021     | Polymer preparation for treating virus infection, and<br>preparation method therefor and use thereof | Shandong Hubble Kisen<br>Biological Technology<br>Co., Ltd.                                                                         | Dosage Forms and<br>Compositions | Severe acute respiratory<br>syndrome coronavirus 2<br>(SARS-CoV-2) infection<br>(COVID-19)                                                                                                                   |
| WO2021211738 (B)                 | out 21, 2021     | Methods and compositions for antiviral treatment                                                     | Sanford Burnham Prebys<br>Medical Discovery<br>Institute<br>The Scripps Research<br>Institute                                       | Methods of Use                   | Severe acute respiratory<br>syndrome coronavirus 2<br>(SARS-CoV-2) infection<br>(COVID-19)                                                                                                                   |
| CN113521020 (B)                  | out 22, 2021     | Redisivir solid dosage form containing water-soluble acid                                            | Qilu Pharmaceutical Co.,<br>Ltd.                                                                                                    | Dosage Forms and<br>Compositions | Severe acute respiratory<br>syndrome coronavirus 2<br>(SARS-CoV-2) infection<br>(COVID-19)                                                                                                                   |

| Patent Family Number                             | Publication Date | Title                                                                                                                                        | Applicant                                                                                               | Subject Matter                | Condition                                                                                                                                                              |
|--------------------------------------------------|------------------|----------------------------------------------------------------------------------------------------------------------------------------------|---------------------------------------------------------------------------------------------------------|-------------------------------|------------------------------------------------------------------------------------------------------------------------------------------------------------------------|
| WO2021213288 (B)                                 | out 28, 2021     | Antiviral application of nucleoside analog or combination formulation containing nucleoside analog                                           | Shanghai Institute of Materia Medica (SIMM)<br>Wuhan Institute of Virology, Chinese Academy of Sciences | Drug Substances               | Coronavirus acute respiratory syndrome Infection, Flavivirus Infection, respiratory syncytial virus (RSV)<br>Influenza<br>Viral hemorrhagic fever (filovrus infection) |
| WO2021215798 (B)<br>KR2021129613<br>KR2021129579 | out 28, 2021     | Pharmaceutical composition for treating sars-coronavirus infection, and medical use thereof                                                  | Institut Pasteur Korea                                                                                  | Combination Products          | Severe acute respiratory syndrome coronavirus 2 (SARS-CoV-2) infection (COVID-19)                                                                                      |
| WO2021216427 (B)                                 | out 28, 2021     | Nucleotide prodrug compounds                                                                                                                 | Ligand Pharmaceuticals, Inc.                                                                            | Drug Substances<br>Prodrugs   | Infection, viral                                                                                                                                                       |
| WO2021219089 (B)                                 | nov 4, 2021      | SARS-CoV-2 inhibitors having covalent modifications for treating coronavirus infections                                                      | Insilico Medicine IP Ltd.                                                                               | Drug Substances               | Severe acute respiratory syndrome coronavirus 2 (SARS-CoV-2) infection (COVID-19)                                                                                      |
| WO2021221043 (B)                                 | nov 4, 2021      | Coronavirus infection therapeutic agent formed through combination of pyrazine derivative and another coronavirus infection therapeutic drug | FUJIFILM Toyama Chemical Co., Ltd.                                                                      | Combination Products          | Severe acute respiratory syndrome coronavirus 2 (SARS-CoV-2) infection (COVID-19)                                                                                      |
| WO2021221435 (B)<br>KR2021133892                 | nov 4, 2021      | Pharmaceutical composition for preventing or treating coronavirus disease-19                                                                 | Institut Pasteur Korea<br>Korea Advanced Institute of Science and Technology (KAIST)                    | Combination Products          | Severe acute respiratory syndrome coronavirus 2 (SARS-CoV-2) infection (COVID-19)                                                                                      |
| WO2021222350 (B)                                 | nov 4, 2021      | Methods of use for single molecule compounds providing multi-target inhibition to treat covid-19                                             | SignalRx Pharmaceuticals Inc                                                                            | Combination Products          | Severe acute respiratory syndrome coronavirus 2 (SARS-CoV-2) infection (COVID-19)                                                                                      |
| WO2021222584 (B)                                 | nov 4, 2021      | Inhibition of SARS-CoV-2 viral entry through administration of lactoferrin and uses thereof                                                  | University of Michigan                                                                                  | Dosage Forms and Compositions | Severe acute respiratory syndrome coronavirus 2 (SARS-CoV-2) infection (COVID-19)                                                                                      |

| Patent Family Number | Publication Date | Title                                                                                        | Applicant                                                                                                              | Subject Matter                                                  | Condition                                                                                                                                                                                                                    |
|----------------------|------------------|----------------------------------------------------------------------------------------------|------------------------------------------------------------------------------------------------------------------------|-----------------------------------------------------------------|------------------------------------------------------------------------------------------------------------------------------------------------------------------------------------------------------------------------------|
| WO2021222807 (B)     | nov 4, 2021      | Fatty acyl and fatty ether conjugates of remdesivir and its active metabolites as antivirals | AJK Biopharmaceutical LLC                                                                                              | Drug Substances<br>Prodrugs                                     | Middle East respiratory syndrome coronavirus (MERS-CoV) infection<br>Severe acute respiratory syndrome coronavirus (SARS-CoV) infection<br>Severe acute respiratory syndrome coronavirus 2 (SARS-CoV-2) infection (COVID-19) |
| WO2021226478 (B)     | nov 11, 2021     | DHODH inhibitor for the treatment of COVID-19                                                | PTC Therapeutics, Inc.                                                                                                 | Combination Products                                            | Severe acute respiratory syndrome coronavirus 2 (SARS-CoV-2) infection (COVID-19)                                                                                                                                            |
| WO2021226479 (B)     | nov 11, 2021     | Inhaled statins for treatment of viral respiratory diseases                                  | Beth Israel Deaconess Medical Center, Inc.<br>InVixa, Inc.<br>University of California VETERANS AFFAIRS MEDICAL CENTER | Methods of Use                                                  | Severe acute respiratory syndrome coronavirus 2 (SARS-CoV-2) infection (COVID-19)                                                                                                                                            |
| CN113633617 (B)      | nov 12, 2021     | A solid dispersion containing redisivir, solid dosage form and preparation method            | Qilu Pharmaceutical Co., Ltd.                                                                                          | Dosage Forms and Compositions                                   | Infection, viral                                                                                                                                                                                                             |
| IN202121046507 (B)   | nov 12, 2021     | Proliposomal dry powder inhaler of remdesivir                                                | Rashtrasant Tukadoji Maharaj Nagpur University                                                                         | Carrier-mediated drug delivery<br>Dosage Forms and Compositions | Severe acute respiratory syndrome coronavirus 2 (SARS-CoV-2) infection (COVID-19)                                                                                                                                            |
| WO2021231361 (B)     | nov 18, 2021     | Pharmaceutical formulation containing active metabolites of remdesivir for inhalation        | Anovent Pharmaceutical (U.S.) LLC                                                                                      | Dosage Forms and Compositions                                   | Infection, viral                                                                                                                                                                                                             |

| Patent Family Number          | Publication Date | Title                                                               | Applicant                                                                                                                                                                                                                                                                                                                                   | Subject Matter                                   | Condition                                                                                                                                                                                                                    |
|-------------------------------|------------------|---------------------------------------------------------------------|---------------------------------------------------------------------------------------------------------------------------------------------------------------------------------------------------------------------------------------------------------------------------------------------------------------------------------------------|--------------------------------------------------|------------------------------------------------------------------------------------------------------------------------------------------------------------------------------------------------------------------------------|
| CN113662927 (B)               | nov 19, 2021     | Nasal administration composition of redisivir                       | Yichang Humanwell Pharmaceutical Co., Ltd.                                                                                                                                                                                                                                                                                                  | Dosage Forms and Compositions                    | Middle East respiratory syndrome coronavirus (MERS-CoV) infection<br>Severe acute respiratory syndrome coronavirus (SARS-CoV) infection<br>Severe acute respiratory syndrome coronavirus 2 (SARS-CoV-2) infection (COVID-19) |
| IN202011020754 (B)            | nov 19, 2021     | Process for the preparation of remdesivir and intermediates thereof | Jubilant Generics Ltd.                                                                                                                                                                                                                                                                                                                      | Prodrugs<br>Synthesis<br>Synthesis Intermediates | Severe acute respiratory syndrome coronavirus 2 (SARS-CoV-2) infection (COVID-19)                                                                                                                                            |
| WO2021233966 (B)<br>EP3912627 | nov 24, 2021     | Methods for the treatment of coronavirus infections                 | Assistance Publique - Hopitaux de Marseille (AP-HM)<br>Centre National de la Recherche Scientifique (CNRS)<br>Ecole Normale Supérieure (ENS) de Lyon<br>Institut de Recherche pour le Développement<br>Institut National de la Santé et de la Recherche Médicale (INSERM)<br>Université Claude Bernard Lyon 1<br>Université d'Aix-Marseille | Methods of Use                                   | Severe acute respiratory syndrome coronavirus 2 (SARS-CoV-2) infection (COVID-19)                                                                                                                                            |

| Patent Family Number          | Publication Date | Title                                                                                                 | Applicant                                                                                                                                                                                                                                                                                                                                                               | Subject Matter                                                  | Condition                                                                         |
|-------------------------------|------------------|-------------------------------------------------------------------------------------------------------|-------------------------------------------------------------------------------------------------------------------------------------------------------------------------------------------------------------------------------------------------------------------------------------------------------------------------------------------------------------------------|-----------------------------------------------------------------|-----------------------------------------------------------------------------------|
| WO2021232169 (B)              | nov 25, 2021     | Synergistic anti-viral pharmaceutical composition containing targeting nanoparticles                  | Nuecology Biomedical Inc.                                                                                                                                                                                                                                                                                                                                               | Combination Products                                            | Severe acute respiratory syndrome coronavirus 2 (SARS-CoV-2) infection (COVID-19) |
| WO2021233966 (B)<br>EP3912627 | nov 25, 2021     | Methods for the treatment of coronavirus infections                                                   | Assistance Publique -<br>Hopitaux de Marseille (AP-<br>HM)<br>Centre National de la<br>Recherche Scientifique<br>(CNRS)<br>Ecole Normale Supérieure<br>(ENS) de Lyon<br>Institut de Recherche pour<br>le Développement<br>Institut National de la<br>Santé et de la Recherche<br>Médicale (INSERM)<br>Université Claude Bernard<br>Lyon 1<br>Université d'Aix-Marseille | Methods of Use                                                  | Severe acute respiratory syndrome coronavirus 2 (SARS-CoV-2) infection (COVID-19) |
| WO2021236570 (B)              | nov 25, 2021     | Pharmaceutical formulation containing remdesivir and its active metabolites for dry powder inhalation | Anovent Pharmaceutical (U.S.) LLC                                                                                                                                                                                                                                                                                                                                       | Carrier-mediated drug delivery<br>Dosage Forms and Compositions | Infection, viral                                                                  |
| WO2021237109 (B)              | nov 25, 2021     | Combination therapy for treatment of viral infections                                                 | Trailhead Biosystems, Inc.                                                                                                                                                                                                                                                                                                                                              | Combination Products                                            | Severe acute respiratory syndrome coronavirus 2 (SARS-CoV-2) infection (COVID-19) |
| IN202011021676 (B)            | nov 26, 2021     | Process for the preparation of remdesivir and novel intermediates thereof                             | Jubilant Generics Ltd.                                                                                                                                                                                                                                                                                                                                                  | Prodrugs<br>Synthesis<br>Synthesis Intermediates                | Severe acute respiratory syndrome coronavirus 2 (SARS-CoV-2) infection (COVID-19) |

| Patent Family Number                          | Publication Date | Title                                                                                                                                                                                                                                    | Applicant              | Subject Matter                | Condition                                                                                                                                                                                                                                                   |
|-----------------------------------------------|------------------|------------------------------------------------------------------------------------------------------------------------------------------------------------------------------------------------------------------------------------------|------------------------|-------------------------------|-------------------------------------------------------------------------------------------------------------------------------------------------------------------------------------------------------------------------------------------------------------|
| IN202041021427 (B)                            | nov 26, 2021     | Solid state form of (s)-2-ethylbutyl 2-(((s)-(((2r,3s,4r,5r)-5-(4-aminopyrrolo[2,1-f][1,2,4]triazin-7-yl)-5-cyano-3,4-dihydroxytetrahydrofuran-2-yl)methoxy)(phenoxy)phosphoryl)amino)propanoate and process for its preparation thereof | MSN Laboratories Ltd.  | Processes                     | Infection, arenavirus<br>Infection, paramyxovirus<br>Middle East respiratory syndrome coronavirus (MERS-CoV) infection<br>Severe acute respiratory syndrome coronavirus 2 (SARS-CoV-2) infection (COVID-19)<br>Viral hemorrhagic fever (filovrus infection) |
| IN202121017287 (B)                            | nov 26, 2021     | Synthesis of remdesivir with reduced and controlled particle size and inhalation formulations thereof                                                                                                                                    | Ultratech India Ltd.   | Synthesis                     | Infection, viral                                                                                                                                                                                                                                            |
| WO2021240531 (B)                              | dez 2, 2021      | Transmucosal dosage forms of remdesivir                                                                                                                                                                                                  | Jubilant Generics Ltd. | Dosage Forms and Compositions | Severe acute respiratory syndrome coronavirus 2 (SARS-CoV-2) infection (COVID-19)                                                                                                                                                                           |
| WO2021240543 (B)<br>EP3915548<br>US2021369619 | dez 2, 2021      | Transmucosal pharmaceutical compositions of antiviral drugs                                                                                                                                                                              | Jubilant Generics Ltd. | Dosage Forms and Compositions | Severe acute respiratory syndrome coronavirus 2 (SARS-CoV-2) infection (COVID-19)                                                                                                                                                                           |
| WO2021242850 (B)                              | dez 2, 2021      | Compositions and methods for preventing and treating SARS-CoV-2 infection                                                                                                                                                                | University of Michigan | Methods of Use                | Severe acute respiratory syndrome coronavirus 2 (SARS-CoV-2) infection (COVID-19)                                                                                                                                                                           |

| Patent Family Number             | Publication Date | Title                                                                                  | Applicant                                                         | Subject Matter                                                                    | Condition                                                                                                                                                                                                                                     |
|----------------------------------|------------------|----------------------------------------------------------------------------------------|-------------------------------------------------------------------|-----------------------------------------------------------------------------------|-----------------------------------------------------------------------------------------------------------------------------------------------------------------------------------------------------------------------------------------------|
| WO2021243157 (B)<br>US2021393653 | dez 2, 2021      | Remdesivir treatment methods                                                           | Gilead Sciences, Inc.                                             | Methods of Use                                                                    | Ebola virus disease<br>Infection, parainfluenza virus<br>Infection, respiratory syncytial virus (RSV)<br>Marburg virus hemorrhagic fever<br>Severe acute respiratory syndrome coronavirus 2 (SARS-CoV-2) infection (COVID-19)<br>Yellow fever |
| CN113735903 (B)                  | dez 3, 2021      | Synthesis method of redisivir                                                          | Shandong Chengchuang Blue Sea Pharmaceutical Technology Co., Ltd. | Prodrugs<br>Synthesis                                                             | Severe acute respiratory syndrome coronavirus 2 (SARS-CoV-2) infection (COVID-19)                                                                                                                                                             |
| CN113754692 (B)                  | dez 7, 2021      | Asymmetric catalytic synthesis method of redosivir intermediate (S, S)-phosphoramidate | Shanghai Jiao Tong University (SJTU)                              | Prodrugs<br>Synthesis Intermediates                                               | Severe acute respiratory syndrome coronavirus 2 (SARS-CoV-2) infection (COVID-19)                                                                                                                                                             |
| US2021379090 (B)                 | dez 9, 2021      | Remdesivir oral delivery system                                                        | Abon Pharmaceuticals, LLC                                         | Carrier-mediated drug delivery<br>Dosage Forms and Compositions<br>Nanotechnology | Infection, viral                                                                                                                                                                                                                              |
| WO2021245700 (B)                 | dez 9, 2021      | Pharmaceutical lipid compositions of remdesivir                                        | Jubilant Generics Ltd.                                            | Carrier-mediated drug delivery<br>Dosage Forms and Compositions                   | Severe acute respiratory syndrome coronavirus 2 (SARS-CoV-2) infection (COVID-19)                                                                                                                                                             |
| WO2021248022 (B)                 | dez 9, 2021      | Methods of treating a coronavirus infection                                            | The General Hospital Corp. (d/b/a Massachusetts General Hospital) | Combination Products                                                              | Severe acute respiratory syndrome coronavirus 2 (SARS-CoV-2) infection (COVID-19)                                                                                                                                                             |



| Patent Family Number             | Publication Date | Title                                                                                               | Applicant                                                                                                                | Subject Matter                                                  | Condition                                                                                                                                              |
|----------------------------------|------------------|-----------------------------------------------------------------------------------------------------|--------------------------------------------------------------------------------------------------------------------------|-----------------------------------------------------------------|--------------------------------------------------------------------------------------------------------------------------------------------------------|
| EP3922734 (B)                    | dez 15, 2021     | Method for determining presence of a pre-determined viral RNA sequence in a sample                  | Ender diagnostics AG                                                                                                     | Biomarkers                                                      | Severe acute respiratory syndrome coronavirus 2 (SARS-CoV-2) infection (COVID-19)                                                                      |
| WO2021248229 (B)                 | dez 16, 2021     | Novel crystalline form of remdesivir                                                                | Apotex Inc.                                                                                                              | Drug Substances Polymorphs                                      | Severe acute respiratory syndrome coronavirus 2 (SARS-CoV-2) infection (COVID-19)                                                                      |
| US2021393659 (B)                 | dez 23, 2021     | Methods for treating arenaviridae and coronaviridae virus infections                                | Gilead Sciences, Inc.                                                                                                    | Methods of Use                                                  | Lassa fever<br>Middle East respiratory syndrome coronavirus (MERS-CoV) infection<br>Severe acute respiratory syndrome coronavirus (SARS-CoV) infection |
| CN113827603 (B)                  | dez 24, 2021     | Application of redsivir in preparing medicine for treating glioma                                   | Beijing Jianmu Technology Co., Ltd.                                                                                      | Methods of Use                                                  | Glioblastoma                                                                                                                                           |
| CN113827604 (B)                  | dez 24, 2021     | Application of redisivir in preparing medicine for treating tumour or anti-tumour metastasis        | Beijing Jianmu Technology Co., Ltd.                                                                                      | Methods of Use                                                  | Cancer                                                                                                                                                 |
| WO2021262715 (B)<br>US2021393663 | dez 30, 2021     | Pharmaceutical formulation containing active metabolites of remdesivir or its analog for inhalation | Anovent Pharmaceutical (U.S.) LLC                                                                                        | Carrier-mediated drug delivery<br>Dosage Forms and Compositions | Asthma<br>Chronic obstructive pulmonary disease (COPD)                                                                                                 |
| WO2021262799 (B)                 | dez 30, 2021     | Anti-viral compounds and methods of using same                                                      | Flagship Pioneering, Inc.                                                                                                | Combination Products                                            | Severe acute respiratory syndrome coronavirus 2 (SARS-CoV-2) infection (COVID-19)                                                                      |
| CN113880846 (B)                  | jan 4, 2022      | Preparation method of 7-iodo-pyrrolo [2, 1-F] [1, 2, 4] triazin-4-amine                             | Shandong Chengchuang Blue Sea Pharmaceutical Technology Co., Ltd.<br>Shandong Chenghui Shuangda Pharmaceutical Co., Ltd. | Prodrugs<br>Synthesis Intermediates                             | Severe acute respiratory syndrome coronavirus 2 (SARS-CoV-2) infection (COVID-19)                                                                      |

| Patent Family Number          | Publication Date | Title                                                                                             | Applicant                                                                                                          | Subject Matter                                                                | Condition                                                                                           |
|-------------------------------|------------------|---------------------------------------------------------------------------------------------------|--------------------------------------------------------------------------------------------------------------------|-------------------------------------------------------------------------------|-----------------------------------------------------------------------------------------------------|
| WO2022008642 (B)              | jan 13, 2022     | Treatment of SARS-CoV-2 infection with a combination of targets                                   | Apeiron Biologics AG                                                                                               | Combination Products<br>Therapeutic Proteins                                  | Severe acute respiratory syndrome coronavirus 2 (SARS-CoV-2) infection (COVID-19)                   |
| WO2022012630 (B)              | jan 20, 2022     | Method for synthesizing C-nucleoside compound                                                     | Academy of Military Medical Sciences (AMMS)<br>Chengdu Aupone Pharmaceutical Co., Ltd.<br>Sichuan University (SCU) | Prodrugs<br>Synthesis Intermediates                                           | Severe acute respiratory syndrome coronavirus 2 (SARS-CoV-2) infection (COVID-19)                   |
| WO2022013353 (B)<br>EP3939576 | jan 20, 2022     | Pharmaceutical compositions for treating infections by a neurotropic virus                        | Ceres Brain Therapeutics SAS<br>Commissariat a l'Energie Atomique et aux Energies Alternatives (CEA)               | Dosage Forms and Compositions                                                 | Infection, HIV<br>Severe acute respiratory syndrome coronavirus 2 (SARS-CoV-2) infection (COVID-19) |
| WO2022015982 (B)              | jan 20, 2022     | Compositions and methods for treating viral infections                                            | University of California                                                                                           | Methods of Use                                                                | Severe acute respiratory syndrome coronavirus 2 (SARS-CoV-2) infection (COVID-19)                   |
| WO2022016073 (B)              | jan 20, 2022     | Pharmaceutical compositions for delivery of remdesivir by inhalation                              | TFF Pharmaceuticals, Inc.<br>University of Texas System                                                            | Carrier-mediated drug delivery<br>Dosage Forms and Compositions<br>Polymorphs | Severe acute respiratory syndrome coronavirus 2 (SARS-CoV-2) infection (COVID-19)                   |
| CN113952457 (B)               | jan 21, 2022     | Application of tiremimide or pharmaceutical composition containing teremimide in anti-coronavirus | Cinkate Pharmaceutical Chemical Intermediate (Shanghai) Co., Ltd.                                                  | Combination Products                                                          | Severe acute respiratory syndrome coronavirus 2 (SARS-CoV-2) infection (COVID-19)                   |
| WO2022020793 (B)              | jan 27, 2022     | Antiviral prodrugs, pharmaceutical formulations, and methods                                      | University of California                                                                                           | Drug Substances<br>Prodrugs                                                   | Coronavirus acute respiratory syndrome                                                              |

| Patent Family Number             | Publication Date | Title                                                                                                                                                | Applicant                                                  | Subject Matter                      | Condition                                                                         |
|----------------------------------|------------------|------------------------------------------------------------------------------------------------------------------------------------------------------|------------------------------------------------------------|-------------------------------------|-----------------------------------------------------------------------------------|
| CN113980024 (B)                  | jan 28, 2022     | Preparation method of redisivir intermediate compound                                                                                                | Hunan Huateng Pharmaceutical Co., Ltd.                     | Prodrugs<br>Synthesis Intermediates | Severe acute respiratory syndrome coronavirus 2 (SARS-CoV-2) infection (COVID-19) |
| WO2022020940 (B)                 | fev 3, 2022      | Novel salts of remdesivir                                                                                                                            | Apotex Inc.                                                | Drug Substances                     | Infection, viral<br>Influenza A                                                   |
| WO2022026622 (B)                 | fev 3, 2022      | Treatment of viral diseases                                                                                                                          | National Research Council of Canada (NRC)                  | Methods of Use                      | Severe acute respiratory syndrome coronavirus 2 (SARS-CoV-2) infection (COVID-19) |
| WO2022029275 (B)                 | fev 10, 2022     | Combination of nicotinamide mononucleotide derivatives and other therapeutic agents for use in the treatment of coronavirus infections and COVID- 19 | Nuvamid SA                                                 | Combination Products                | Coronavirus acute respiratory syndrome                                            |
| WO2022029604 (B)                 | fev 10, 2022     | Microemulsion drug delivery system for treatment of acute respiratory distress syndrome                                                              | Council for Scientific and Industrial Research (CSIR) (ZA) | Methods of Use                      | Severe acute respiratory syndrome coronavirus 2 (SARS-CoV-2) infection (COVID-19) |
| WO2022035286 (B)<br>KR2022021888 | fev 17, 2022     | Pharmaceutical composition for prevention or treatment of coronavirus infection disease-19                                                           | Korea United Pharm. Inc.                                   | Combination Products                | Severe acute respiratory syndrome coronavirus 2 (SARS-CoV-2) infection (COVID-19) |
| WO2022035911 (B)                 | fev 17, 2022     | Methods of treating coronavirus infections by co-administering an FKBP ligand and an antiviral agent                                                 | Tutela Pharmaceuticals Inc.                                | Combination Products                | Severe acute respiratory syndrome coronavirus 2 (SARS-CoV-2) infection (COVID-19) |
| CN114053289 (B)                  | fev 18, 2022     | Application of redisivir in preparing medicine for preventing and treating neurodegenerative diseases                                                | Beijing Jianmu Technology Co., Ltd.                        |                                     |                                                                                   |
| WO2022040761 (B)                 | mar 3, 2022      | Dendrimer-drug conjugate                                                                                                                             | Starpharma Pty. Ltd.                                       | Drug Conjugates<br>Drug Substances  | Coronavirus acute respiratory syndrome                                            |
| WO2022047441 (B)                 | mar 3, 2022      | Formulations of anti-viral compounds                                                                                                                 | Emphascience Inc.                                          | Dosage Forms and Compositions       | Infection, viral                                                                  |
| US2022071928 (B)                 | mar 10, 2022     | Polyamine transport inhibitors as antivirals                                                                                                         | Boston University<br>University of Central Florida (UCF)   |                                     |                                                                                   |

| Patent Family Number | Publication Date | Title                                                                                                                                                                                                                               | Applicant              | Subject Matter | Condition |
|----------------------|------------------|-------------------------------------------------------------------------------------------------------------------------------------------------------------------------------------------------------------------------------------|------------------------|----------------|-----------|
| WO2022055449 (B)     | mar 17, 2022     | Use of active substances with antiviral, anti malarial, and/or mucolytic properties in the treatment of viral lung diseases including COVID-19 by soft mist inhaler or vibration mesh technology nebulizer through inhalation route | Istanbul Ueniversitesi |                |           |
